# Supplementary material
Source: PubMed Central journal article supplement (PMC9925453)
Supplement: 41467_2023_36445_MOESM3_ESM.pdf [file 41467_2023_36445_MOESM3_ESM.pdf]

## **Description of Additional Supplementary Files**

File Name: Supplementary Data 1

Description: siRNA sequences

File Name: Supplementary Data 2

Description: gRNA sequences

File Name: Supplementary Data 3

Description: Antibodies

File Name: Supplementary Data 4

Description: qPCR primers
